# Supplementary material for: The Immature Fiber Mutant Phenotype of Cotton (Gossypium hirsutum) Is Linked to a 22-bp Frame-Shift Deletion in a Mitochondria Targeted Pentatricopeptide Repeat Gene
Source: PubMed Central journal article supplement (PMC4889659; doi:10.1534/g3.116.027649), 2016-03-29
Supplement: supp_g3.116.027649_FigureS1.pdf [file supp_g3.116.027649_FigureS1.pdf]

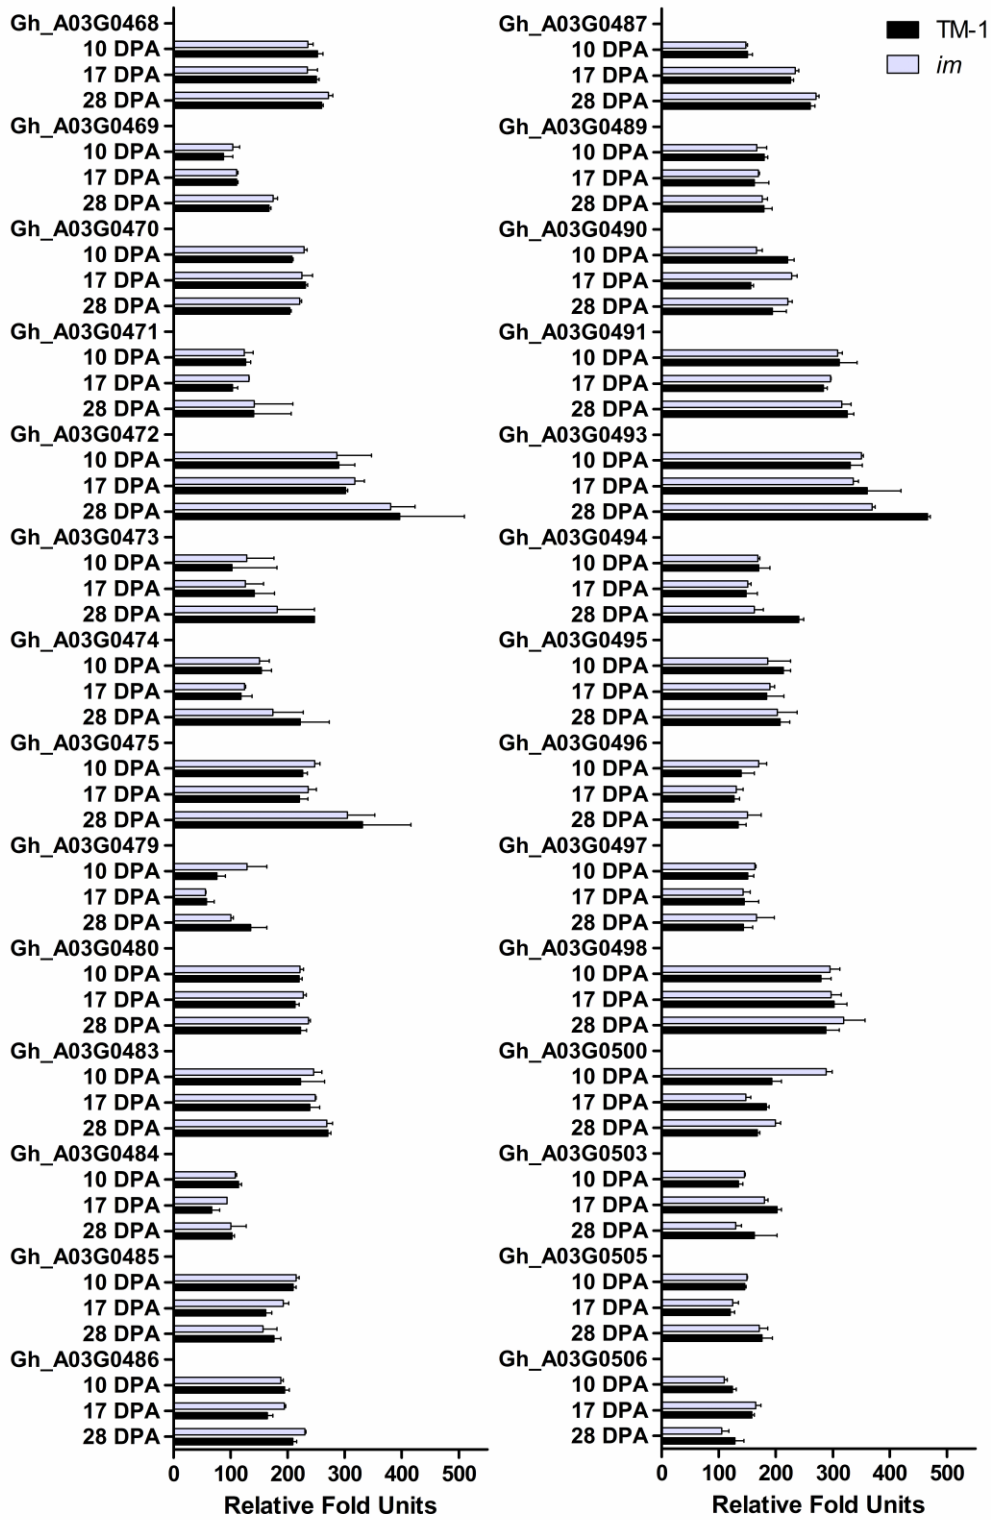

**Figure S1** Gene expression near the *im* locus in fiber cells by RT-qPCR. Expression is presented for three developmental time points: 10, 17, and 28 days post anthesis (DPA).
