# Supplementary material for: The Immature Fiber Mutant Phenotype of Cotton (Gossypium hirsutum) Is Linked to a 22-bp Frame-Shift Deletion in a Mitochondria Targeted Pentatricopeptide Repeat Gene
Source: PubMed Central journal article supplement (PMC4889659; doi:10.1534/g3.116.027649), 2016-03-29
Supplement: supp_g3.116.027649_FigureS2.pdf [file supp_g3.116.027649_FigureS2.pdf]

```

          10      20      30      40      50      60
im      ATGCGTTTATCTTCAAAGCAAACGGTCTATTGTTTCACGAAATCAAGGCTCTCTCGTCTC
      .....
TM-1    ATGCGTTTATCTTCAAAGCAAACGGTCTATTGTTTCACGAAATCAAGGCTCTCTCGTCTC
          10      20      30      40      50      60

          70      80      90     100     110     120
im      AAATCGGCTTCCCTTTGTACATCAGCTTCAAATGACGCCGAAGCCGTGGAAATCGCTTCT
      .....
TM-1    AAATCGGCTTCCCTTTGTACATCAGCTTCAAATGACGCCGAAGCCGTGGAAATCGCTTCT
          70      80      90     100     110     120

          130     140     150     160     170     180
im      ATCCTCAGTAAAAATGACTGGAAACGACTTCTTGAAACATCATCAGAATTGACAAGCAAG
      .....
TM-1    ATCCTCAGTAAAAATGACTGGAAACGACTTCTTGAAACATCATCAGAATTGACAAGCAAG
          130     140     150     160     170     180

          190     200     210     220     230     240
im      CTGAACCCAGAAATAGTTCACTCCGTTCTTCTCCAAAACCTCGATTCATGATCCCGAACGC
      .....
TM-1    CTGAACCCAGAAATAGTTCACTCCGTTCTTCTCCAAAACCTCGATTCATGATCCCGAACGC
          190     200     210     220     230     240

          250     260     270     280     290     300
im      CTTTTTCAGTTTTCTTCAACTGGGCAAGTCAGCAATCCCCGAACCCTCAAATTTGGATTCT
      .....
TM-1    CTTTTTCAGTTTTCTTCAACTGGGCAAGTCAGCAATCCCCGAACCCTCAAATTTGGATTCT
          250     260     270     280     290     300

          310     320     330     340     350     360
im      TTTTCTTTTCTAGCAGTTACTTTATGTAATTCGAAGATGTTTCGTAAAGCCACTATTGTT
      .....
TM-1    TTTTCTTTTCTAGCAGTTACTTTATGTAATTCGAAGATGTTTCGTAAAGCCACTATTGTT
          310     320     330     340     350     360

          370     380     390     400     410     420
im      TTAGACAGCATGGTTAGGACTAGAAGGCCCGTTCAGGCCATTTTGGGTTCAATTATTAGG
      .....
TM-1    TTAGACAGCATGGTTAGGACTAGAAGGCCCGTTCAGGCCATTTTGGGTTCAATTATTAGG
          370     380     390     400     410     420

          430     440     450     460     470     480
im      TGCTGGAAGGGCTATGAAGGGAATTA TGTCGGGGTTTTTCGATATTTTGATTGGTTGTTAT
      .....
TM-1    TGCTGGAAGGGCTATGAAGGGAATTA TGTCGGGGTTTTTCGATATTTTGATTGGTTGTTAT
          430     440     450     460     470     480

          490     500     510     520     530     540
im      AAGAAAATGGGTTCTTGAACGATGCTGTTTATGTTTTTTTGGGTGCTAAAGAAGTTGGG
      .....
TM-1    AAGAAAATGGGTTCTTGAACGATGCTGTTTATGTTTTTTTGGGTGCTAAAGAAGTTGGG
          490     500     510     520     530     540

```

550 560 570

```

im      GTTTTGCCT-----TTTTAGGTGATTTGCTTAAGGTAAATAAG
       :::::::::::                               :::::::::::
TM-1   GTTTTGCCTGGTTTGGCTTGTGTAATAACTTTTTAGGTGATTTGCTTAAGGTAAATAAG
       550      560      570      580      590      600

580      590      600      610      620      630
im      TTGGATTTGTTTTGGAAGGTTTTCAATGGGATGATAGATGCTAAATTGGTGCCTGATGTT
       :::::::::::                               :::::::::::
TM-1   TTGGATTTGTTTTGGAAGGTTTTCAATGGGATGATAGATGCTAAATTGGTGCCTGATGTT
       610      620      630      640      650      660

640      650      660      670      680      690
im      TATACTTTTACCAATGTGATTAATGCTCATTGTTCGAGTAGGGGATATTGAGAAGGCCAAA
       :::::::::::                               :::::::::::
TM-1   TATACTTTTACCAATGTGATTAATGCTCATTGTTCGAGTAGGGGATATTGAGAAGGCCAAA
       670      680      690      700      710      720

700      710      720      730      740      750
im      AGGGTGTTTTATGGATATGGAGGAGAAGGGATGTAGCCCTGGTTTGGTTACTTATAATGTT
       :::::::::::                               :::::::::::
TM-1   AGGGTGTTTTATGGATATGGAGGAGAAGGGATGTAGCCCTGGTTTGGTTACTTATAATGTT
       730      740      750      760      770      780

760      770      780      790      800      810
im      ATGATTGGTGGACTGTGTAAAGCTGGTGCTGTTGATGAAGCATTGAAGTTGAAAACTCC
       :::::::::::                               :::::::::::
TM-1   ATGATTGGTGGACTGTGTAAAGCTGGTGCTGTTGATGAAGCATTGAAGTTGAAAACTCC
       790      800      810      820      830      840

820      830      840      850      860      870
im      ATGAGTCGGAAGGGTTTTCAACCCTGATGCATATACTTACAATACGGTTATTAATGGGTTT
       :::::::::::                               :::::::::::
TM-1   ATGAGTCGGAAGGGTTTTCAACCCTGATGCATATACTTACAATACGGTTATTAATGGGTTT
       850      860      870      880      890      900

880      890      900      910      920      930
im      TGTAGGCATAACAGATTTTCAAGGAAGCAAATTTGATGATGGAGGAAATGCGTTGTGCAGGC
       :::::::::::                               :::::::::::
TM-1   TGTAGGCATAACAGATTTTCAAGGAAGCAAATTTGATGATGGAGGAAATGCGTTGTGCAGGC
       910      920      930      940      950      960

940      950      960      970      980      990
im      TTAAATCCTAACCATTTTGCTTACACAGCTTTGATTGATGGGTTTCATTAAACGGGGGAGC
       :::::::::::                               :::::::::::
TM-1   TTAAATCCTAACCATTTTGCTTACACAGCTTTGATTGATGGGTTTCATTAAACGGGGGAGC
       970      980      990      1000     1010     1020

1000     1010     1020     1030     1040     1050
im      ATGGCCGAGGCTTTCCAAGTCAAGGATGAGATGGTTGCTTGTGGAATTAACCGAATGTG
       :::::::::::                               :::::::::::
TM-1   ATGGCCGAGGCTTTCCAAGTCAAGGATGAGATGGTTGCTTGTGGAATTAACCGAATGTG
       1030     1040     1050     1060     1070     1080

1060     1070     1080     1090     1100     1110
im      TTCACGTATAATGTGCTTATTGGTGGGGCTTCTAAGGCTGGTGACTTGGAGAAAGGAAAA
       :::::::::::                               :::::::::::
TM-1   TTCACGTATAATGTGCTTATTGGTGGGGCTTCTAAGGCTGGTGACTTGGAGAAAGGAAAA

```

|      |                                                                              |      |      |      |      |      |
|------|------------------------------------------------------------------------------|------|------|------|------|------|
|      | 1090                                                                         | 1100 | 1110 | 1120 | 1130 | 1140 |
| im   | 1120                                                                         | 1130 | 1140 | 1150 | 1160 | 1170 |
|      | GCTCTGTTTCGATGAGATGGTTTTGATTGGCATCGGACCTGATGCACAAACATTTAGTCTT                |      |      |      |      |      |
|      | :::::::::::::::::::::::::::::::::::::::::::::::::::::::::::::::::::::::::::: |      |      |      |      |      |
| TM-1 | GCTCTGTTTCGATGAGATGGTTTTGATTGGCATCGGACCTGATGCACAAACATTTAGTCTT                |      |      |      |      |      |
|      | 1150                                                                         | 1160 | 1170 | 1180 | 1190 | 1200 |
| im   | 1180                                                                         | 1190 | 1200 | 1210 | 1220 | 1230 |
|      | ATGATCCAGAGTTATTGTCGACAAGGGAATTTCTCAAGGCCCATGAATTGTTTGAAGAG                  |      |      |      |      |      |
|      | :::::::::::::::::::::::::::::::::::::::::::::::::::::::::::::::::::::::::::: |      |      |      |      |      |
| TM-1 | ATGATCCAGAGTTATTGTCGACAAGGGAATTTCTCAAGGCCCATGAATTGTTTGAAGAG                  |      |      |      |      |      |
|      | 1210                                                                         | 1220 | 1230 | 1240 | 1250 | 1260 |
| im   | 1240                                                                         | 1250 | 1260 | 1270 | 1280 | 1290 |
|      | ATGAAGGAACACAACCTTGACACCCACGATGTACACTTATAATGGTATAATTAGTGGATTA                |      |      |      |      |      |
|      | :::::::::::::::::::::::::::::::::::::::::::::::::::::::::::::::::::::::::::: |      |      |      |      |      |
| TM-1 | ATGAAGGAACACAACCTTGACACCCACGATGTACACTTATAATGGTATAATTAGTGGATTA                |      |      |      |      |      |
|      | 1270                                                                         | 1280 | 1290 | 1300 | 1310 | 1320 |
| im   | 1300                                                                         | 1310 | 1320 | 1330 | 1340 | 1350 |
|      | TGTCACTGTGGAGATCTTGGTCGAGCTAATTATGTTTTTGAGGCAATGATTAAGGTAGGG                 |      |      |      |      |      |
|      | :::::::::::::::::::::::::::::::::::::::::::::::::::::::::::::::::::::::::::: |      |      |      |      |      |
| TM-1 | TGTCACTGTGGAGATCTTGGTCGAGCTAATTATGTTTTTGAGGCAATGATTAAGGTAGGG                 |      |      |      |      |      |
|      | 1330                                                                         | 1340 | 1350 | 1360 | 1370 | 1380 |
| im   | 1360                                                                         | 1370 | 1380 | 1390 | 1400 | 1410 |
|      | TTGAAGCCCAACGTTGTTATGTATACAAATCTGATAAAAGGTCATATTCAGAAAAGTAGA                 |      |      |      |      |      |
|      | :::::::::::::::::::::::::::::::::::::::::::::::::::::::::::::::::::::::::::: |      |      |      |      |      |
| TM-1 | TTGAAGCCCAACGTTGTTATGTATACAAATCTGATAAAAGGTCATATTCAGAAAAGTAGA                 |      |      |      |      |      |
|      | 1390                                                                         | 1400 | 1410 | 1420 | 1430 | 1440 |
| im   | 1420                                                                         | 1430 | 1440 | 1450 | 1460 | 1470 |
|      | TTCAAGGAAGCAAGAAAGATTCTCAACAGAATGATGGAGAATGGACAAATGGCTGATATC                 |      |      |      |      |      |
|      | :::::::::::::::::::::::::::::::::::::::::::::::::::::::::::::::::::::::::::: |      |      |      |      |      |
| TM-1 | TTCAAGGAAGCAAGAAAGATTCTCAACAGAATGATGGAGAATGGACAAATGGCTGATATC                 |      |      |      |      |      |
|      | 1450                                                                         | 1460 | 1470 | 1480 | 1490 | 1500 |
| im   | 1480                                                                         | 1490 | 1500 | 1510 | 1520 | 1530 |
|      | TTTTGTTGCAATACTCTTTTAAGTGGCTTATGTAAGTCCCAAATGATGGACGAAGCAAGG                 |      |      |      |      |      |
|      | :::::::::::::::::::::::::::::::::::::::::::::::::::::::::::::::::::::::::::: |      |      |      |      |      |
| TM-1 | TTTTGTTGCAATACTCTTTTAAGTGGCTTATGTAAGTCCCAAATGATGGACGAAGCAAGG                 |      |      |      |      |      |
|      | 1510                                                                         | 1520 | 1530 | 1540 | 1550 | 1560 |
| im   | 1540                                                                         | 1550 | 1560 | 1570 | 1580 | 1590 |
|      | AGCTTCTTAGTCGAAATGGTTGACAGGGGGTTGAAGCCTAATGAAATTACCTATGGGACT                 |      |      |      |      |      |
|      | :::::::::::::::::::::::::::::::::::::::::::::::::::::::::::::::::::::::::::: |      |      |      |      |      |
| TM-1 | AGCTTCTTAGTCGAAATGGTTGACAGGGGGTTGAAGCCTAATGAAATTACCTATGGGACT                 |      |      |      |      |      |
|      | 1570                                                                         | 1580 | 1590 | 1600 | 1610 | 1620 |
| im   | 1600                                                                         | 1610 | 1620 | 1630 | 1640 | 1650 |
|      | TTAATCCATGGATATGCTAAGGCCGGGGAAATGGAGGCAGTAGAAAGGTGTTTCAGAGAG                 |      |      |      |      |      |
|      | :::::::::::::::::::::::::::::::::::::::::::::::::::::::::::::::::::::::::::: |      |      |      |      |      |
| TM-1 | TTAATCCATGGATATGCTAAGGCCGGGGAAATGGAGGCAGTAGAAAGGTGTTTCAGAGAG                 |      |      |      |      |      |
|      | 1630                                                                         | 1640 | 1650 | 1660 | 1670 | 1680 |
|      | 1660                                                                         | 1670 | 1680 | 1690 | 1700 | 1710 |

```

im      ATGCGTAGTTATGGTATAGCTCCAAATAATGCTATCTATACTATATTGATTAATAGCCTT
       :
TM-1   ATGCGTAGTTATGGTATAGCTCCAAATAATGCTATCTATACTATATTGATTAATAGCCTT
       1690      1700      1710      1720      1730      1740

       1720      1730      1740      1750      1760      1770
im      TGCAAAGTGGGAAATGTAACCGAGGCTCTGTGCGACATTTAGGCACATGTCTGAAAAAGGT
       :
TM-1   TGCAAAGTGGGAAATGTAACCGAGGCTCTGTGCGACATTTAGGCACATGTCTGAAAAAGGT
       1750      1760      1770      1780      1790      1800

       1780      1790      1800      1810      1820      1830
im      GTGCTCCCAGACATAAAGACTTACACTGCACTCATCCACGGCCTTGCAGCAAATGGTAGA
       :
TM-1   GTGCTCCCAGACATAAAGACTTACACTGCACTCATCCACGGCCTTGCAGCAAATGGTAGA
       1810      1820      1830      1840      1850      1860

       1840      1850      1860      1870      1880      1890
im      ATTAATGATGCAATGCAACTGTTCTCTCAACTTGATGAAAAGGGTATAGTGCCTGATGTA
       :
TM-1   ATTAATGATGCAATGCAACTGTTCTCTCAACTTGATGAAAAGGGTATAGTGCCTGATGTA
       1870      1880      1890      1900      1910      1920

       1900      1910      1920      1930      1940      1950
im      TTCACTTATACTTCTCTCATTTCTGTCTTTTCTAAGCTTGGTGATATGGAGGCTGCTCTC
       :
TM-1   TTCACTTATACTTCTCTCATTTCTGTCTTTTCTAAGCTTGGTGATATGGAGGCTGCTCTC
       1930      1940      1950      1960      1970      1980

       1960      1970      1980      1990      2000      2010
im      AACCTTTATGATAAGATGTGTCAAAGGGCATTGCTCCTAATATTGTTACATATAATGCA
       :
TM-1   AACCTTTATGATAAGATGTGTCAAAGGGCATTGCTCCTAATATTGTTACATATAATGCA
       1990      2000      2010      2020      2030      2040

       2020      2030      2040      2050      2060      2070
im      ATGATTGATGGTCTGTGTAAGTTAGGTGACACCGAGAAAGCTAGGAGGGTGTTTAATGAA
       :
TM-1   ATGATTGATGGTCTGTGTAAGTTAGGTGACACCGAGAAAGCTAGGAGGGTGTTTAATGAA
       2050      2060      2070      2080      2090      2100

       2080      2090      2100      2110      2120      2130
im      ATCGCACAGAGAGGCTTGGCACCTAATGTCAAGAGTTATTCTATAATTATAGATGGATAT
       :
TM-1   ATCGCACAGAGAGGCTTGGCACCTAATGTCAAGAGTTATTCTATAATTATAGATGGATAT
       2110      2120      2130      2140      2150      2160

       2140      2150      2160      2170      2180      2190
im      TGCAAATCTGGAAATTTAACTGAGGCATTTTCAGTTACTGGATAAAAATGCCCTCAAAGGGT
       :
TM-1   TGCAAATCTGGAAATTTAACTGAGGCATTTTCAGTTACTGGATAAAAATGCCCTCAAAGGGT
       2170      2180      2190      2200      2210      2220

       2200      2210      2220      2230      2240      2250
im      GTTCCACCTGATAGTTTTACTTATTGTGCCCTTATTGACGGATGCTGTAAAGGAGGAGAA
       :
TM-1   GTTCCACCTGATAGTTTTACTTATTGTGCCCTTATTGACGGATGCTGTAAAGGAGGAGAA

```

|      |                                                                              |      |      |      |      |      |
|------|------------------------------------------------------------------------------|------|------|------|------|------|
|      | 2230                                                                         | 2240 | 2250 | 2260 | 2270 | 2280 |
| im   | 2260                                                                         | 2270 | 2280 | 2290 | 2300 | 2310 |
|      | TTGGACAAGGCGCTCTCTTTGTTTTCTGAAATGTTGCAGAAGGGTTTTGATCCCACCTCT                 |      |      |      |      |      |
|      | :::::::::::::::::::::::::::::::::::::::::::::::::::::::::::::::::::::::::::: |      |      |      |      |      |
| TM-1 | TTGGACAAGGCGCTCTCTTTGTTTTCTGAAATGTTGCAGAAGGGTTTTGATCCCACCTCT                 |      |      |      |      |      |
|      | 2290                                                                         | 2300 | 2310 | 2320 | 2330 | 2340 |
| im   | 2320                                                                         | 2330 | 2340 | 2350 | 2360 | 2370 |
|      | TCTTTCAATGCATTGATCAATGGGTTATGCAAGACGGGGAAACCAAATGAAGCTATGAGG                 |      |      |      |      |      |
|      | :::::::::::::::::::::::::::::::::::::::::::::::::::::::::::::::::::::::::::: |      |      |      |      |      |
| TM-1 | TCTTTCAATGCATTGATCAATGGGTTATGCAAGACGGGGAAACCAAATGAAGCTATGAGG                 |      |      |      |      |      |
|      | 2350                                                                         | 2360 | 2370 | 2380 | 2390 | 2400 |
| im   | 2380                                                                         | 2390 | 2400 | 2410 | 2420 | 2430 |
|      | CTGTTAGAAGACATGGCCAGTAACTGTATTACACCAAACCATAGAACCTATAACAATCCTA                |      |      |      |      |      |
|      | :::::::::::::::::::::::::::::::::::::::::::::::::::::::::::::::::::::::::::: |      |      |      |      |      |
| TM-1 | CTGTTAGAAGACATGGCCAGTAACTGTATTACACCAAACCATAGAACCTATAACAATCCTA                |      |      |      |      |      |
|      | 2410                                                                         | 2420 | 2430 | 2440 | 2450 | 2460 |
| im   | 2440                                                                         | 2450 | 2460 | 2470 | 2480 | 2490 |
|      | ATTGATTATCACAGCAAGGCAGGAAGGATGGAAGAAGCCGAAATTCTCTTTTTGGAGATG                 |      |      |      |      |      |
|      | :::::::::::::::::::::::::::::::::::::::::::::::::::::::::::::::::::::::::::: |      |      |      |      |      |
| TM-1 | ATTGATTATCACAGCAAGGCAGGAAGGATGGAAGAAGCCGAAATTCTCTTTTTGGAGATG                 |      |      |      |      |      |
|      | 2470                                                                         | 2480 | 2490 | 2500 | 2510 | 2520 |
| im   | 2500                                                                         | 2510 | 2520 | 2530 | 2540 | 2550 |
|      | CAAAGGAGGAATCTGGTTCCGAATGTTGTAACCTACAACCTTGCTTTTACATGGTTACTAC                |      |      |      |      |      |
|      | :::::::::::::::::::::::::::::::::::::::::::::::::::::::::::::::::::::::::::: |      |      |      |      |      |
| TM-1 | CAAAGGAGGAATCTGGTTCCGAATGTTGTAACCTACAACCTTGCTTTTACATGGTTACTAC                |      |      |      |      |      |
|      | 2530                                                                         | 2540 | 2550 | 2560 | 2570 | 2580 |
| im   | 2560                                                                         | 2570 | 2580 | 2590 | 2600 | 2610 |
|      | AGATTAGGGAGGAAAGCAGAGATGTTTGATCTTTTCGAGTCCATGGCTGCAAAAGGGGTT                 |      |      |      |      |      |
|      | :::::::::::::::::::::::::::::::::::::::::::::::::::::::::::::::::::::::::::: |      |      |      |      |      |
| TM-1 | AGATTAGGGAGGAAAGCAGAGATGTTTGATCTTTTCGAGTCCATGGCTGCAAAAGGGGTT                 |      |      |      |      |      |
|      | 2590                                                                         | 2600 | 2610 | 2620 | 2630 | 2640 |
| im   | 2620                                                                         | 2630 | 2640 | 2650 | 2660 | 2670 |
|      | GAACCTGATGAAATTATTTATCGTCTTATTGCTAATGCTTACTTGGAAGAAAATAGTTTG                 |      |      |      |      |      |
|      | :::::::::::::::::::::::::::::::::::::::::::::::::::::::::::::::::::::::::::: |      |      |      |      |      |
| TM-1 | GAACCTGATGAAATTATTTATCGTCTTATTGCTAATGCTTACTTGGAAGAAAATAGTTTG                 |      |      |      |      |      |
|      | 2650                                                                         | 2660 | 2670 | 2680 | 2690 | 2700 |
| im   | 2680                                                                         | 2690 | 2700 | 2710 | 2720 | 2730 |
|      | ATTGGAATGTTGAAGCTGTTGGATGAAATTCTAGTGAAGGATGTTGTGTTTCGATAAAAAT                |      |      |      |      |      |
|      | :::::::::::::::::::::::::::::::::::::::::::::::::::::::::::::::::::::::::::: |      |      |      |      |      |
| TM-1 | ATTGGAATGTTGAAGCTGTTGGATGAAATTCTAGTGAAGGATGTTGTGTTTCGATAAAAAT                |      |      |      |      |      |
|      | 2710                                                                         | 2720 | 2730 | 2740 | 2750 | 2760 |
| im   | 2740                                                                         | 2750 | 2760 | 2770 | 2780 | 2790 |
|      | CCCCTTTTCTGCTGCTGGACGCTGTATGCAAAAGAGAGGAGTTTTCGGAAGTTCCAAAG                  |      |      |      |      |      |
|      | :::::::::::::::::::::::::::::::::::::::::::::::::::::::::::::::::::::::::::: |      |      |      |      |      |
| TM-1 | CCCCTTTTCTGCTGCTGGACGCTGTATGCAAAAGAGAGGAGTTTTCGGAAGTTCCAAAG                  |      |      |      |      |      |
|      | 2770                                                                         | 2780 | 2790 | 2800 | 2810 | 2820 |
|      | 2800                                                                         | 2810 | 2820 | 2830 | 2840 | 2850 |

```

im      TCACTTGAAGAAATGGCAGAACAAGGACTTAAGCTCAGTCCAATTACATGTCACAAGCTT
      .....
TM-1    TCACTTGAAGAAATGGCAGAACAAGGACTTAAGCTCAGTCCAATTACATGTCACAAGCTT
      2830      2840      2850      2860      2870      2880

      2860      2870      2880      2890      2900      2910
im      GTTCATGGTTTTTCATGATAAGGGAAATCCAGAGAAAGCAGAATGGATTCTTGAGAGCTTG
      .....
TM-1    GTTCATGGTTTTTCATGATAAGGGAAATCCAGAGAAAGCAGAATGGATTCTTGAGAGCTTG
      2890      2900      2910      2920      2930      2940

      2920      2930      2940      2950      2960      2970
im      GTCCGGTTCGGATGGATTCCAAACACCACCCTGTGAATAGCATTATTGATAAAGAAAAT
      .....
TM-1    GTCCGGTTCGGATGGATTCCAAACACCACCCTGTGAATAGCATTATTGATAAAGAAAAT
      2950      2960      2970      2980      2990      3000

      2980      2990      3000      3010      3020      3030
im      GATGTTGCAAACCTGGAGAGCCCTAACAATTCTCCCAAGCAAGCAACGTGCGGAGTTGCT
      .....
TM-1    GATGTTGCAAACCTGGAGAGCCCTAACAATTCTCCCAAGCAAGCAACGTGCGGAGTTGCT
      3010      3020      3030      3040      3050      3060

      3040      3050
im      TGTCAAGTGTA
      .....
TM-1    TGTCAAGTGTA
      3070

```

**Figure S2** Alignment of *im* and TM-1 alleles of PPR Gh\_ A03G0489. Primer locations for CFBid0001 are highlighted.
