# Supplementary material for: The Immature Fiber Mutant Phenotype of Cotton (Gossypium hirsutum) Is Linked to a 22-bp Frame-Shift Deletion in a Mitochondria Targeted Pentatricopeptide Repeat Gene
Source: PubMed Central journal article supplement (PMC4889659; doi:10.1534/g3.116.027649), 2016-03-29
Supplement: supp_g3.116.027649_TableS1.pdf [file supp_g3.116.027649_TableS1.pdf]

**Table S1** Diversity panel of 163 *Gossypium hirsutum* accessions genotyped for four markers near the *im* locus.

| Variety Name               | CFB<br>5887 | CFB<br>5888 | CFBid<br>0001 | CFBid<br>0002 | SA#     | PI#       | Country of Origin |
|----------------------------|-------------|-------------|---------------|---------------|---------|-----------|-------------------|
| 1OE                        | A           | A           | A             | A             | SA-1441 | PI 361150 | Greece            |
| 320F                       | B           | B           | A             | B             | SA-1167 | PI 529233 | India             |
| 4S-180                     | H           | H           | A             | H             | SA-1442 | PI 361151 | Greece            |
| A-618                      | A           | A           | A             | A             | SA-1297 | PI 408996 | Mozambique        |
| A-637-33                   | A           | H           | A             | H             | SA-1300 | PI 408999 | Mozambique        |
| Acala 1517<br>(New Mexico) | A           | A           | A             | A             | SA-0239 | PI 528607 | USA               |
| Acala Maxxa                | A           | H           | A             | H             |         |           | USA               |
| Acala Nemex                | B           | B           | A             | B             | SA-2289 | PI 590568 | USA               |
| Acala Royale               | B           | B           | A             | A             | SA-3778 | PI 542049 | USA               |
| AK Djura 182               | H           | H           | A             | A             | SA-1202 | 364267    | Uzbekistan        |
| ALA 70-236                 | A           | A           | A             | A             | SA-1283 | PI 402499 | Swaziland         |
| Albar 627                  | H           | H           | A             | H             | SA-1440 | PI 529494 | Zambia            |
| Aleppo I                   | H           | H           | A             | H             | SA-1395 | 529450    | Syria             |
| Allen 333                  | A           | A           | A             | A             | SA-1262 | 529318    | Togo              |
| ALTIMA                     | H           | H           | A             | B             |         |           | USA               |
| Arkot 8606                 | H           | H           | A             | A             | SA-3112 | PI 628634 | USA               |
| ATLAS                      | B           | B           | A             | B             |         |           | USA               |
| Auburn 56                  | A           | A           | A             | A             | SA-1149 | 529215    | USA               |
| Auburn 634                 |             |             |               |               |         |           |                   |
| RNR                        | A           | A           | A             | A             | SA-2413 | 607237    | USA               |
| AUSTIN                     | H           | H           | A             | A             |         |           | USA               |
| Beli Izvor                 | H           | H           | A             | H             | SA-1724 | PI 532789 | Bulgaria          |
| Big Boll                   |             |             |               |               |         |           |                   |
| Triumph UA 8-<br>20 (P1)   | A           | A           | A             | A             | SA-0148 | 606883    | Trinidad & Tobago |
| BLIGHTMASTER               | A           | A           | A             | A             |         |           | USA               |
| BPA 68 CB<br>4030          | H           | H           | A             | B             | SA-1243 | PI 365538 | Uganda            |
| Bulgaria P73               | A           | H           | A             | H             | SA-1407 | 529462    | Bulgaria          |
| CABD3SHP3S-<br>1-90        | A           | A           | A             | A             | SA-2388 | PI 603007 | USA               |
| CAHUGLBBCS-<br>1-88        | A           | A           | A             | A             | SA-2386 | PI 603005 | USA               |
| Cambodia #4                | A           | A           | A             | A             | SA-0501 | 528805    | Cambodia          |
| CB 4011                    | B           | B           | A             | B             | SA-1204 | PI 364269 | Uzbekistan        |
| Dehkanin                   |             |             |               |               |         |           |                   |
| CD3HCHULBH-<br>1-88        | A           | A           | A             | A             | SA-2382 | PI 603001 | USA               |
| Central (Sel               | H           | H           | A             | A             | SA-1210 | PI 529275 | Venezuela         |

| Variety Name                                | CFB<br>5887 | CFB<br>5888 | CFBid<br>0001 | CFBid<br>0002 | SA#     | PI#       | Country of Origin |
|---------------------------------------------|-------------|-------------|---------------|---------------|---------|-----------|-------------------|
| Coker 100)                                  |             |             |               |               |         |           |                   |
| CHACO 510                                   |             |             |               |               |         |           |                   |
| INTA                                        | A           | A           | A             | A             | SA-1759 | PI 606817 | Argentina         |
| Christidis                                  | A           | A           | A             | A             | SA-1166 | PI 529232 | Greece            |
| Ciano Cocorim<br>92                         | A           | A           | A             | A             | SA-2206 | PI 570666 | Mexico            |
| Cleveland W.R.<br>Wannamaker's<br>Coker 100 | H           | H           | A             | H             | SA-0296 | 528645    | USA               |
| WILT                                        | A           | A           | A             | A             | SA-0451 | 528761    | USA               |
| COKER 100A                                  | H           | H           | A             | B             |         |           | USA               |
| COKER 124                                   | B           | B           | A             | B             |         |           | USA               |
| Coker 312                                   | A           | A           | A             | A             | SA-1213 | PI 529278 | USA               |
| COKER 315                                   | A           | A           | A             | A             |         |           | USA               |
| Coker's<br>Clevewilt #3                     | A           | H           | A             | A             | SA-0253 | 528617    | USA               |
| Colombia 1                                  |             |             |               |               |         |           |                   |
| Gossica N21                                 |             |             |               |               |         |           |                   |
| VIR-7263                                    | H           | H           | A             | B             | SA-3475 | n/a       | Colombia          |
| Columbia                                    | A           | A           | A             | A             | SA-0429 | 528743    | Columbia          |
| Cook 912 Pope                               | B           | B           | A             | B             | SA-0053 | 528466    | USA               |
| Cristina                                    | A           | A           | A             | A             | SA-1757 | 606815    | Spain             |
| Dekalb 220                                  | A           | A           | A             | A             | SA-1156 | 529222    | USA               |
| Del Cerro                                   | A           | A           | A             | A             | SA-1302 | 529358    | Brazil            |
| Delcot 277                                  | A           | A           | A             | A             | SA-1193 | 529258    | USA               |
| Delfos 9169                                 | A           | A           | A             | A             | SA-0309 | 528655    | USA               |
| Deltapine<br>Smoothleaf                     | H           | H           | A             | H             | SA-1153 | PI 529219 | USA               |
| Deltapine 10-1                              | B           | B           | A             | B             | SA-0369 | PI 528699 | USA               |
| Deltapine 12                                | B           | B           | A             | B             | SA-0459 | PI 528768 | USA               |
| Deltapine 15                                | H           | H           | A             | B             |         |           | USA               |
| Deltapine 20                                | B           | B           | A             | B             | SA-1513 | PI 529567 | USA               |
| Deltapine 25                                | H           | H           | A             | H             | SA-1215 | PI 529280 | USA               |
| Deltapine 393                               | H           | B           | A             | B             |         |           | USA               |
| Deltapine 491                               | H           | H           | A             | H             | SA-3139 | PI 618609 | USA               |
| Deltapine 50                                | B           | B           | A             | B             | SA-1512 | PI 529566 | USA               |
| Deltapine 5409                              | A           | A           | A             | A             |         |           | USA               |
| Deltapine 5415                              | H           | H           | A             | B             |         |           | USA               |
| Deltapine 5690                              | A           | A           | A             | A             |         |           | USA               |
| Deltapine 6                                 | B           | A           | A             | A             | SA-0870 | PI 528969 | USA               |
| Deltapine 66                                | A           | A           | A             | A             | SA-1511 | PI 529565 | USA               |
| Deltapine 80                                | B           | B           | A             | B             | SA-2297 | PI 607179 | USA               |

| Variety Name      | CFB<br>5887 | CFB<br>5888 | CFBid<br>0001 | CFBid<br>0002 | SA#     | PI#       | Country of Origin |
|-------------------|-------------|-------------|---------------|---------------|---------|-----------|-------------------|
| Deltapine 826     | B           | B           | A             | B             | SA-2294 | PI 607176 | USA               |
| Deltapine 90      | A           | A           | A             | A             |         |           | USA               |
| DES 119           | A           | A           | A             | A             |         |           | USA               |
| DES 716           | B           | B           | A             | B             | SA-0998 | PI 529067 | USA               |
| Dixie King        | A           | A           | A             | A             | SA-0951 | 529021    | USA               |
| DIXIE KING II     | A           | A           | A             | B             |         |           | USA               |
| Dixie Triumph     | B           | B           | A             | B             | SA-0852 | 528956    | USA               |
| Dixie Triumph     |             |             |               |               |         |           |                   |
| Wannamaker's      | B           | B           | A             | B             | SA-0294 | 528643    | USA               |
| Dunn 219          | B           | B           | A             | B             | SA-2377 | PI 600744 | USA               |
| Dunn 325          | H           | H           | A             | B             | SA-3209 | 601199    | USA               |
| Empire W.R. 61    | A           | A           | A             | A             | SA-1158 | 529224    | USA               |
| Felistana UA-7-18 | A           | A           | A             | A             | SA-0186 | 606910    | Trinidad & Tobago |
| Fibermax 832      | B           | B           | A             | B             |         |           | USA               |
| Fibermax 958      | H           | H           | A             | A             |         |           | Australia         |
| Fibermax 966      | H           | H           | A             | A             |         |           | Australia         |
| Fibermax 989      | A           | A           | A             | A             |         |           | Australia         |
| GA 230            | A           | A           | A             | A             |         |           | USA               |
| GA 4303           | A           | A           | A             | A             |         |           | USA               |
| GA 98028          | H           | H           | A             | H             | SA-3182 | PI 633796 | USA               |
| GA KING           | A           | A           | A             | A             |         |           | USA               |
| Gregg             | A           | A           | A             | A             | SA-1025 | 529094    | USA               |
| Gringo            | A           | A           | A             | A             | SA-1760 | PI 606818 | Argentina         |
| Guazuncho II      | H           | H           | A             | A             | SA-1761 | PI 606819 | Argentina         |
| HS26              | H           | H           | A             | H             |         |           | USA               |
| IAC 17            | A           | A           | A             | A             | SA-1348 | PI 438980 | Brazil            |
| IAC 18            | A           | A           | A             | A             | SA-1349 | PI 438981 | Brazil            |
| <i>im</i>         | B           | B           | B             | B             |         |           |                   |
| LA 17             | A           | H           | A             | H             |         |           | USA               |
| Lambricht         |             |             |               |               |         |           |                   |
| 2020A             | B           | B           | A             | B             | SA-2895 | 592517    | USA               |
| Lankart           | H           | H           | A             | A             | SA-3185 | PI 601147 | USA               |
| LANKART 57        | B           | B           | A             | B             |         |           | USA               |
| Lightning         |             |             |               |               |         |           |                   |
| Express           | A           | A           | A             | A             | SA-0883 | 528978    | USA               |
| Limpopo           | A           | A           | A             | A             | SA-2332 | 607199    | S. Africa         |
| Lisina 11 CB      |             |             |               |               |         |           |                   |
| 4021              | H           | A           | A             | A             | SA-1234 | PI 365529 | Pakistan          |
| Lockett BXL       | H           | H           | A             | A             | SA-1533 | 529587    | USA               |
| Lone Star         | H           | B           | A             | B             | SA-0282 | PI 528636 | USA               |
| Lou Mienne        | B           | B           | A             | B             | SA-1423 | PI 452103 | China             |

| Variety Name          | CFB<br>5887 | CFB<br>5888 | CFBid<br>0001 | CFBid<br>0002 | SA#     | PI#       | Country of Origin |
|-----------------------|-------------|-------------|---------------|---------------|---------|-----------|-------------------|
| M240                  | A           | H           | A             | A             |         |           | USA               |
| Magnolia              | H           | H           | A             | H             | SA-0963 | PI 529033 | USA               |
| Mar 5 PD208S-<br>4-90 | A           | A           | A             | A             | SA-2390 | PI 603009 | USA               |
| Marico<br>(Smooth)    | H           | H           | A             | A             | SA-2330 | PI 607197 | S. Africa         |
| McNair 210            | A           | A           | A             | A             | SA-1535 | 529589    | USA               |
| McNair 235            | A           | A           | A             | A             | SA-1472 | 529526    | USA               |
| MD 17                 | A           | A           | A             | A             |         |           | USA               |
| MD 51ne               | A           | A           | A             | A             |         |           | USA               |
| MD 52ne               | A           | A           | A             | A             |         |           | USA               |
| Mebane                | A           | A           | A             | A             | SA-0892 | 528985    | USA               |
| NM24016               | A           | A           | A             | A             |         |           | USA               |
| Pak-22 Vir-<br>5850   | A           | A           | A             | A             | SA-3232 |           | Pakistan          |
| Paymaster 101         | A           | A           | A             | A             | SA-1021 | PI 529090 | USA               |
| Paymaster 145         | B           | B           | A             | B             | SA-1548 | PI 529602 | USA               |
| Paymaster 303         | A           | A           | A             | A             | SA-1551 | PI 529605 | USA               |
| Paymaster 792         | H           | H           | A             | H             | SA-1555 | PI 529609 | USA               |
| PD-1                  | A           | A           | A             | A             | SA-1595 | PI 606805 | USA               |
| PD-2                  | A           | A           | A             | A             | SA-1596 | PI 606806 | USA               |
| PD-5256               | A           | A           | A             | B             | SA-1736 | PI 543865 | USA               |
| PD-<br>93001(Brown)   | A           | A           | A             | A             | SA-2210 | PI 573281 | USA               |
| PD-93007              | A           | A           | A             | A             | SA-2260 | PI 591418 | USA               |
| PD-9364               | A           | A           | A             | A             | SA-1575 | PI 529629 | USA               |
| Pope                  | A           | A           | A             | A             | SA-0996 | 529065    | USA               |
| Pora INTA             | A           | A           | A             | A             | SA-1762 | PI 606820 | Argentina         |
| PSC355                | A           | A           | A             | A             |         |           | USA               |
| Reba P288             | A           | A           | A             | A             | SA-2223 | PI 607158 | Chad              |
| Rex                   | A           | A           | A             | A             | SA-1071 | 529140    | USA               |
| RN96527               | A           | A           | A             | A             | SA-3492 | PI 636103 | USA               |
| RN96625-1             | H           | H           | A             | H             | SA-3493 |           | USA               |
| Rowden                | H           | B           | A             | B             | SA-0300 | PI 528649 | USA               |
| S-6524                | A           | A           | A             | A             | SA-2572 | PI 630195 | Uzbekistan        |
| Sabie                 | H           | H           | A             | A             | SA-2326 | PI 607193 | S. Africa         |
| Saenz Pena 61         | A           | A           | A             | A             | SA-0986 | PI 529055 | Argentina         |
| Shan 5245             | H           | H           | A             | H             | SA-3203 | n/a       | China             |
| Shan 5710             | H           | H           | A             | A             | SA-3204 | n/a       | China             |
| Siokra 104-90         | B           | B           | A             | B             | SA-2241 | PI 607166 | Australia         |
| SL-7-1                | A           | A           | A             | A             |         |           | USA               |
| Stoneville            | B           | B           | A             | B             | SA-1723 | PI 547084 | USA               |

| Variety Name            | CFB<br>5887 | CFB<br>5888 | CFBid<br>0001 | CFBid<br>0002 | SA#     | PI#       | Country of Origin |
|-------------------------|-------------|-------------|---------------|---------------|---------|-----------|-------------------|
| LA887                   |             |             |               |               |         |           |                   |
| Stoneville 2C           | H           | H           | A             | H             | SA-0313 | 528659    | USA               |
| STONEVILLE<br>453       | B           | B           | A             | B             | SA-3749 |           | USA               |
| Stoneville 474          | H           | A           | A             | A             |         |           | USA               |
| Stoneville 825          | B           | B           | A             | B             |         |           | USA               |
| Storm King<br>TAM 2562  | B           | B           | A             | B             | SA-1004 | 529073    | USA               |
| RKNR                    | H           | H           | A             | A             | SA-2401 | 607225    | USA               |
| TAM 90J-57s             | H           | H           | A             | A             | SA-2919 | PI 614955 | USA               |
| TAM 98D102              | A           | A           | A             | A             | SA-3516 | PI 636490 | USA               |
| TAMCOT SP-21            | H           | H           | A             | B             | SA-1580 | 529634    | USA               |
| TAMCOT SP-37            | A           | A           | A             | A             | SA-1583 | 529637    | USA               |
| Tashkent I              | H           | H           | A             | B             | SA-1392 | PI 529447 | USSR              |
| Tashkent II             | B           | H           | A             | H             | SA-1393 | PI 529448 | USSR              |
| Tashkent III            | H           | H           | A             | H             | SA-1394 | PI 529449 | USSR              |
| Tejas                   | A           | A           | A             | A             | SA-2894 | PI 591047 | USA               |
| TM-1                    | A           | A           | A             | A             |         |           | USA               |
| UA48                    | B           | B           | A             | B             |         |           | USA               |
| UK 64                   | A           | A           | A             | A             | SA-1285 | PI 407455 | Tanzania          |
| Victoria                | A           | A           | A             | A             | SA-1758 | PI 606816 | Spain             |
| VIR-5817 LR-IV          | B           | B           | A             | B             | SA-3237 | n/a       | Pakistan          |
| VIR-6615                |             |             |               |               |         |           |                   |
| MCU-5                   | B           | B           | A             | B             | SA-3256 | n/a       | India             |
| XA142 FUZZ              | A           | A           | A             | A             |         |           | USA               |
| XZ142 naked             | B           | B           | A             | B             |         |           | USA               |
| Zhong Mian<br>Suo 7 hao | H           | H           | A             | H             | SA-3205 | n/a       | China             |
| Zhong Mian<br>Suo 8 hao | A           | A           | A             | A             | SA-3206 | n/a       | China             |
| Zhong Mian<br>Suo 9 hao | A           | A           | A             | A             | SA-3207 | n/a       | China             |
