# Supplementary material for: The Immature Fiber Mutant Phenotype of Cotton (Gossypium hirsutum) Is Linked to a 22-bp Frame-Shift Deletion in a Mitochondria Targeted Pentatricopeptide Repeat Gene
Source: PubMed Central journal article supplement (PMC4889659; doi:10.1534/g3.116.027649), 2016-03-29
Supplement: supp_g3.116.027649_TableS2.pdf [file supp_g3.116.027649_TableS2.pdf]

**Table S2** Primer Sequences

| <b>Name</b>   | <b>Sequence</b>           |
|---------------|---------------------------|
| CFB5887_imF   | GAATGATGTTCTCGTTTGTCTC    |
| CFB5887_wtF   | GAATGATGTTCTCGTTTGTCTA    |
| CFB5887_R     | ATTTCCCTGTTCTGATTTGTAA    |
| CFB5888_wtF   | AACACCCCTAAGTCATTTGTA     |
| CFB5888_R     | AAGGGACAACATGATTAGTTT     |
| CFBid0001_F   | TGCCTTCTCAATATCCCCTACT    |
| CFBid0001_R   | GGAAGGGCTATGAAGGGAACTA    |
| CFBid0002_F   | TTGAGGGCACGTCATTGATTA     |
| CFBid0002_R   | ACAAATATTTCTCCTCTTTGGT    |
| CFBid0003_F   | TGAGGGGTTCTAGGTGCATA      |
| CFBid0003_R   | CGTGTGTTAAAGGTAAACATAGAGG |
| i00510Gh_imF  | AAGGTTTGAATAGAAAAGTGAAG   |
| i00510Gh_imR  | TTTCGTTTCGTACAAGAGG       |
| i00510Gh_wtF  | AAGGTTTGAATAGAAAAGTGAAG   |
| i00510Gh_wtR  | GCCCGTCGTTTCGTTTC         |
| Gh_A03G0468_F | TGTTTTGGCTAGTGAGGAATTG    |
| Gh_A03G0468_R | ATCTTCAAACCTCCTTTGCCTG    |
| Gh_A03G0469_F | AGTTGTTGCTCTCTTGGAAGAAA   |
| Gh_A03G0469_R | TAGTCCAGTAAATCGACGAACA    |
| Gh_A03G0470_F | AGGTTGATGATGATGTTGGTTG    |
| Gh_A03G0470_R | TTGGATATACTACACCGTCACC    |
| Gh_A03G0471_F | ATCCTCCAAATGTTCCAGACAG    |
| Gh_A03G0471_R | TCCATGGATATACCTATTGAGGAT  |
| Gh_A03G0472_F | GCTTTGGGTGTCAAACCTTATCA   |
| Gh_A03G0472_R | ACTCGGGGATAGTAGTAAGAGT    |
| Gh_A03G0473_F | TCCATGTTCTCCTGATCTTACC    |
| Gh_A03G0473_R | CTACTAAGACTTCTAACCAATTTT  |
| Gh_A03G0474_F | GATGACCATACTGAAGCTCAA     |
| Gh_A03G0474_R | TGGAATCATCGATTTTGGGAAC    |
| Gh_A03G0475_F | AGGTTGTACGAAAGTGCTATTTG   |
| Gh_A03G0475_R | CCATTTATTCCTACCATCTGGGT   |
| Gh_A03G0476_F | AGAGGTATGGGACCTTAATTGC    |
| Gh_A03G0476_R | AAGGCTACATATTCCTCAGCTT    |
| Gh_A03G0477_F | TCCAATCACCTTAATCCATCCA    |
| Gh_A03G0477_R | GTTAATCTGTCTCCCTCGAGAA    |
| Gh_A03G0478_F | CCATAGCACTGATGAGACGAAA    |
| Gh_A03G0478_R | AATGAAGTTTGTAGCTTTGCCA    |
| Gh_A03G0479_F | GCCCATATTCAGAAAGATGACG    |
| Gh_A03G0479_R | CCATCAAGAACACCAACTGATT    |
| Gh_A03G0480_F | AAGAATGGTGATATAGGTGCCA    |

| <b>Name</b>   | <b>Sequence</b>               |
|---------------|-------------------------------|
| Gh_A03G0480_R | TCAGAAGCACAAGTCTGTAATC        |
| Gh_A03G0481_F | CGCTGTATCTAAACTTGCTGTT        |
| Gh_A03G0481_R | ATTACCGGACCAACTTGTCATA        |
| Gh_A03G0483_F | ATGGCAAAAGGTTTCGGA            |
| Gh_A03G0483_R | GGTCAACCTCTTGAGCAAAAA         |
| Gh_A03G0484_F | TGCAAGACATTTCCAACATGAA        |
| Gh_A03G0484_R | GTCATCATCGACCAAGACATTT        |
| Gh_A03G0485_F | GCTGTTAAGGTTTTTGACGTG         |
| Gh_A03G0485_R | ACAATCTCTGATAATGTGCAGC        |
| Gh_A03G0486_F | GAGCAGAAATCAATAAGTCCCG        |
| Gh_A03G0486_R | CAATGGTAGTCTTTGCACTTGA        |
| Gh_A03G0487_F | TGGTTGGTTGAAAAGTGTGAT         |
| Gh_A03G0487_R | ATGCCTGTTCAACGTAAATGAA        |
| Gh_A03G0488_F | TTTGTGTCATTGGCAGGAATTT        |
| Gh_A03G0488_R | ATCCTCATGATCATCAACACCT        |
| Gh_A03G0489_F | TATGCAAAAGAGAGGAGTTTTTCG      |
| Gh_A03G0489_R | GCTTGTGACATGTAATTGGACTG       |
| Gh_A03G0490_F | CAAGCAGTCATTAGCTGTTTCAA       |
| Gh_A03G0490_R | TATTCTCAGGATTGATGTCCTGC       |
| Gh_A03G0491_F | CAAGTTGGAGGTGAAGGAGATA        |
| Gh_A03G0491_R | CACCACCCTTTCCCTAAATCTT        |
| Gh_A03G0492_F | CCTAATCAAAATCCACGTGCTG        |
| Gh_A03G0492_R | CCGAAAACATACCTGCAGTAGTAA      |
| Gh_A03G0493_F | TAGTCAAGGGGAGAGTGAAAATG       |
| Gh_A03G0493_R | ATGTCCTTGTTCAAATCAACCTG       |
| Gh_A03G0494_F | AGGAGTTTCTTCTTGCTTTGA         |
| Gh_A03G0494_R | ACCGTTCGATGTTATCAAAAAGC       |
| Gh_A03G0495_F | ACCCTTGATTCTCAAGCTGATG        |
| Gh_A03G0495_R | CAGACTCTAGTGCATTTTGAAGG       |
| Gh_A03G0496_F | GGTGTCTTCTAGGAGATTCGTTG       |
| Gh_A03G0496_R | ACAAACCATTGTTATCTTCACGG       |
| Gh_A03G0497_F | GCAGGAACTTATTCGGAAAGGAA       |
| Gh_A03G0497_R | GAAAGGATGTATTGGCTTGAACC       |
| Gh_A03G0498_F | GAGTCTAAGATGGTTATGCCTGG       |
| Gh_A03G0498_R | CTTCTCTAATAGCAAACCGCATC       |
| Gh_A03G0499_F | TCTCGTAATTGGACAAGTGTTGA       |
| Gh_A03G0499_R | ACTCTGCTGAAATAAGGAGAAGC       |
| Gh_A03G0500_F | AAATTCAGGGGACTTAAGAGGAG       |
| Gh_A03G0500_R | GTAATTGAGCTCTTGCACTGATT       |
| Gh_A03G0501_F | TGAGTGCTGCCTTGACAGATG         |
| Gh_A03G0501_R | GTTCTTAACAACCTTGCTTACTTTCTGCC |
| Gh_A03G0502_F | GACTAAAGGGTTTGAGTCGTACA       |

| <b>Name</b>   | <b>Sequence</b>         |
|---------------|-------------------------|
| Gh_A03G0502_R | CCTTGTATATTGGCCATTACCGT |
| Gh_A03G0503_F | CGATAGATGAGCTGAGAAAGTCA |
| Gh_A03G0503_R | GCTAACCCATGTCTGTATATCGT |
| Gh_A03G0504_F | ACCGTCTTCTTCAACTAAATGGA |
| Gh_A03G0504_R | CAGCAATAAGGCTATTAACCGTG |
| Gh_A03G0505_F | GAGATGGTTGTCTATAGTCCAGG |
| Gh_A03G0505_R | ATACTATACATGCTTCCCGCAAT |
| Gh_A03G0506_F | CTCACACAGGACCATCATATTCA |
| Gh_A03G0506_R | GACTAAGCTGAGAAGCAACAAAG |
