# Supplementary material for: The Immature Fiber Mutant Phenotype of Cotton (Gossypium hirsutum) Is Linked to a 22-bp Frame-Shift Deletion in a Mitochondria Targeted Pentatricopeptide Repeat Gene
Source: PubMed Central journal article supplement (PMC4889659; doi:10.1534/g3.116.027649), 2016-03-29
Supplement: supp_g3.116.027649_TableS3.pdf [file supp_g3.116.027649_TableS3.pdf]

**Table S3** Domains of PPR Gh\_A03G0489 and nucleotide binding site position-specific weight matrix. Bolded residues are absent from either ORF in *im* transcripts. "1\_4\_ii" refer to the nucleotide specifying residues in the PPR repeats as in Yagi et al. 2013.

| Motif           | 1_4_ii | A     | C     | G     | T     | Sequence                                                     |
|-----------------|--------|-------|-------|-------|-------|--------------------------------------------------------------|
| Transit Peptide |        |       |       |       |       | MRLSSKQTVYCFTKSRLSRLKSASLCTSASNDAAEVEIASILSKNDWKRLLLETSSSELT |
| linker-1        |        |       |       |       |       | SKLNPEIVHSVLLQNSIHDPERLFSFFNWASQQSPNPQ                       |
| PPR-1           | DSQ    | 0.362 | 0.131 | 0.205 | 0.302 | NLDSFSFLAVTLCNSKMFVKATIVLDSMVRTRRPV                          |
| linker-2        |        |       |       |       |       | QAILGSIIRCWKGYEGN                                            |
| PPR-2           | GDG    | 0.000 | 0.000 | 0.000 | 0.000 | YVGVFILIGCYKKMGSWNDVYVFLGAKEVGVLP                            |
| PPR-3           | AND    | 0.103 | 0.184 | 0.113 | 0.601 | <b>GLACCNNFLGDLLKVNKLDLFWKVFNG</b> MIDAKLVP                  |
| PPR-4           | YTG    | 0.466 | 0.090 | 0.284 | 0.160 | DVYTFNTVINAHCRVGDIEKAKRVFMDMEEKGCSF                          |
| PPR-5           | VND    | 0.078 | 0.308 | 0.034 | 0.580 | GLVTYNVMIGGLCKAGAVDEALKLKNMSRKGFP                            |
| PPR-6           | YNN    | 0.165 | 0.467 | 0.155 | 0.212 | DAYTYNTVINGFCRHNRFQEAKLMMMEEMRCAGLNP                         |
| PPR-7           | FTN    | 0.755 | 0.069 | 0.057 | 0.120 | NHFAYTALIDGFIKRGSMAEAFQVKDEMVAACGKIP                         |
| PPR-8           | FND    | 0.178 | 0.197 | 0.103 | 0.522 | NVFTYNVLIIGGASKAGDLEKGGKALFDEMVLIGIGP                        |
| PPR-9           | QST    | 0.362 | 0.131 | 0.205 | 0.302 | DAQTFSLMIQSYCRQGNFLKAHELFEEMKEHNLTTP                         |
| PPR-10          | YNN    | 0.165 | 0.467 | 0.155 | 0.212 | TMYTYNGIISGLCHCGDLGRANYVFEAMIKVGLKP                          |
| PPR-11          | VTD    | 0.097 | 0.076 | 0.697 | 0.131 | NVVMYTNLIKGHIQKSRFKEARKILNRMMENGQMA                          |
| PPR-12          | FNN    | 0.449 | 0.076 | 0.344 | 0.131 | DIFCCNTLLSGLCKSQMMDEARSFLVEMVDRGLKP                          |
| PPR-13          | IGN    | 0.550 | 0.060 | 0.050 | 0.341 | NEITYGTLIHGYAKAGEMEAVEVERCFREMRSYGIAP                        |
| PPR-14          | ATD    | 0.162 | 0.104 | 0.586 | 0.149 | NNAIYTYLINSLCKVGNVTEALSTFRHMSEKGVLP                          |
| PPR-15          | KTD    | 0.162 | 0.104 | 0.586 | 0.149 | DIKTYTALIHGLAANGRINDAMQLFSQLDEKGIAP                          |
| PPR-16          | FTN    | 0.755 | 0.069 | 0.057 | 0.120 | DVFTYTSLSIVFSKLGDMEEAALNLYDKMCQKGIAP                         |
| PPR-17          | VNN    | 0.211 | 0.609 | 0.047 | 0.133 | NIVTYNAMIDGLCKLGDTEKARRVFNEIAQRGLAP                          |
| PPR-18          | KSD    | 0.223 | 0.159 | 0.325 | 0.293 | NVKSYSIIIDGYCKSGNLTEAFQLLDKMPKSGVPP                          |
| PPR-19          | FCT    | 0.550 | 0.099 | 0.207 | 0.143 | DSFTYCALIDGCKGGELDKALSFLFSEMLQKGFDP                          |
| PPR-20          | SNN    | 0.165 | 0.467 | 0.155 | 0.212 | -TSSFNALINGLCKTGKPNAMRLLEDMASNCITP                           |
| PPR-21          | RTN    | 0.573 | 0.106 | 0.147 | 0.175 | NHRTYTYLIDYHSHKAGRMEEAEILFLEMQRRLNLP                         |
| PPR-22          | VND    | 0.078 | 0.308 | 0.034 | 0.580 | NVVTYNLLLHGYYRLGRKAEMFDLFEESMAAKGVEP                         |
| PPR-23          | IRD    | 0.000 | 0.000 | 0.000 | 0.000 | DEIIYRLIANAYLEENSLIGMLKLLDEILVKDVVF                          |
| PPR-24          | NFS    | 0.000 | 0.000 | 0.000 | 0.000 | DKNPTFLLLDVAVCKREEFSEVPKSLLEEMAEQGLKL                        |

| <b>Motif</b> | <b>1_4_ii</b> | <b>A</b> | <b>C</b> | <b>G</b> | <b>T</b> | <b>Sequence</b>                      |
|--------------|---------------|----------|----------|----------|----------|--------------------------------------|
| PPR-25       | IHD           | 0.000    | 0.000    | 0.000    | 0.000    | SPITCHKLVHGFHDKGNPEKAEWILESLVRFGWIP  |
| C-term       |               |          |          |          |          | NTTIVNSIIDKENDVANLESPNNSPKQATCGVACQV |
